# Supplementary material for: Predicting and accessing metastable phases
Source: Royal Society of Chemistry journal article supplement (doi:10.1039/d2ma00995a), 2023-01-01
Supplement: d2ma00995a1.pdf [file d2ma00995a1.pdf]

## Predicting and Accessing Metastable Phases

V. Kocovski, J. A. Valdez, B. K. Derby, Y. Q. Wang, G. Pilania, and B. P. Uberuaga

### Phonon dispersion

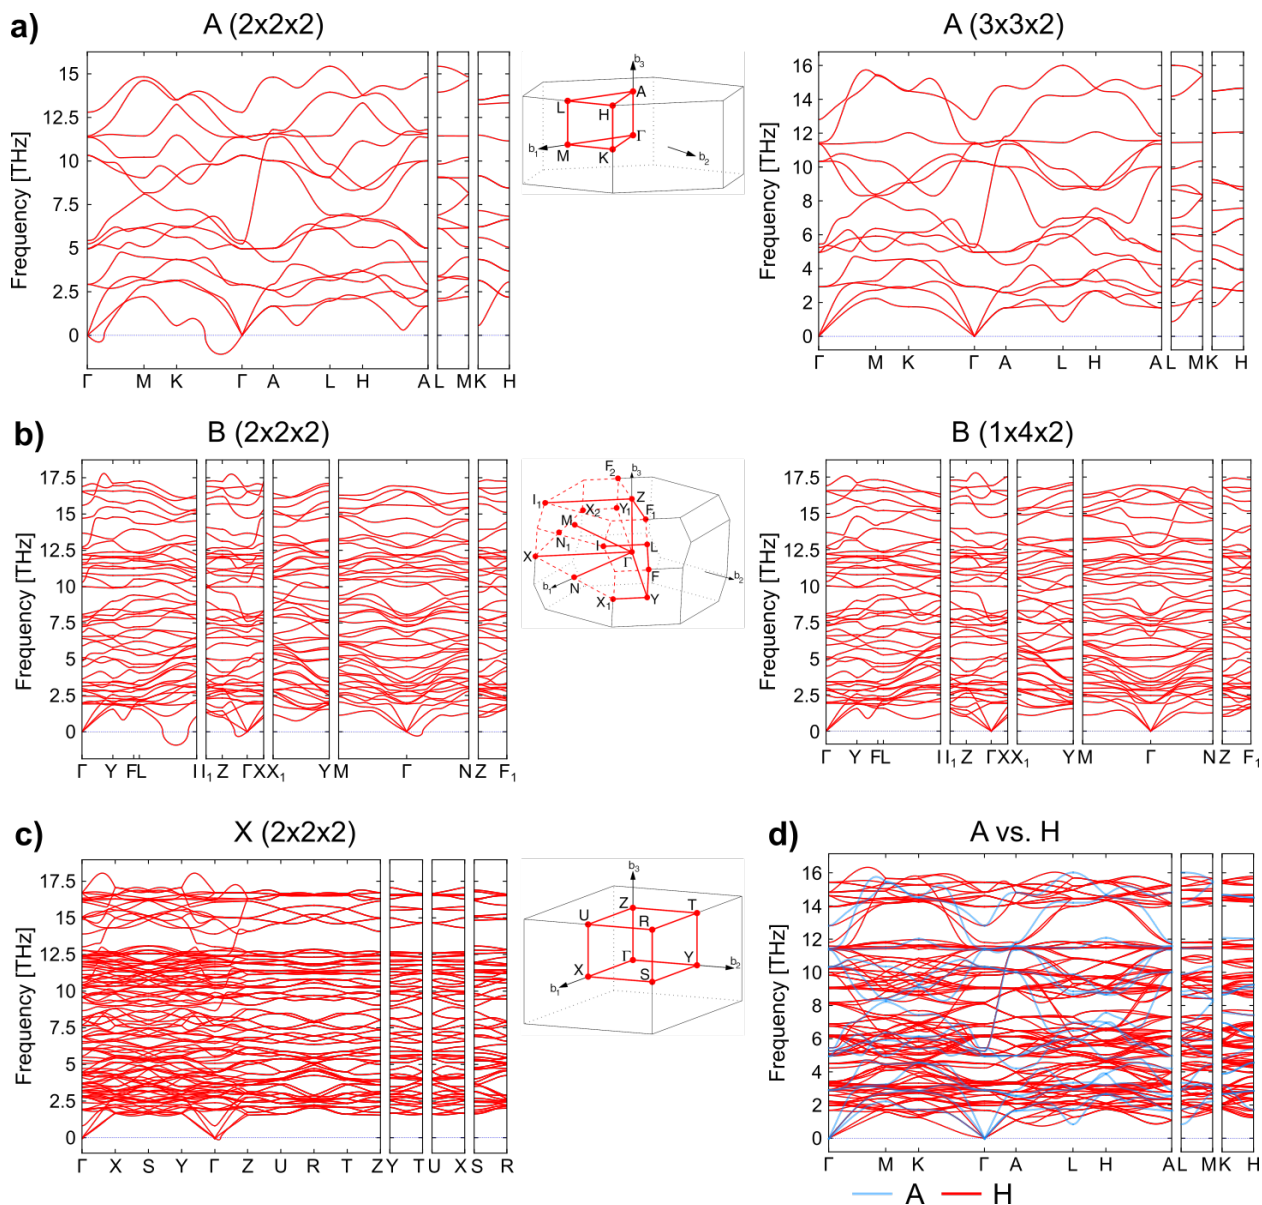

**Figure S1.** Phonon dispersion of: a) A, b) B, and c) X phase. The used k-point paths are shown in the middle. d) Comparison between the phonon dispersion of A (blue) and H phase (red). The “purple” bands in (d) emphasize the overlap in dispersion in the A and H phases.

## Crystallographic Parameters

**Table S1.** Crystallographic parameters of the studied polymorphs for all studied oxides (chemistries).

| Polymorph | Oxide                          | a [Å]   | b [Å]   | c [Å]   | $\alpha$ [°] | $\beta$ [°] | $\gamma$ [°] |
|-----------|--------------------------------|---------|---------|---------|--------------|-------------|--------------|
| A         | La <sub>2</sub> O <sub>3</sub> | 3.9051  | 3.9051  | 6.0367  | 90.00        | 90.00       | 120.00       |
|           | Nd <sub>2</sub> O <sub>3</sub> | 3.8243  | 3.8243  | 5.9555  | 90.00        | 90.00       | 120.00       |
|           | Sm <sub>2</sub> O <sub>3</sub> | 3.7569  | 3.7569  | 5.8787  | 90.00        | 90.00       | 120.00       |
|           | Gd <sub>2</sub> O <sub>3</sub> | 3.6922  | 3.6922  | 5.8053  | 90.00        | 90.00       | 120.00       |
|           | Dy <sub>2</sub> O <sub>3</sub> | 3.6408  | 3.6408  | 5.7530  | 90.00        | 90.00       | 120.00       |
|           | Er <sub>2</sub> O <sub>3</sub> | 3.5951  | 3.5951  | 5.7082  | 90.00        | 90.00       | 120.00       |
|           | Lu <sub>2</sub> O <sub>3</sub> | 3.5282  | 3.5282  | 5.6442  | 90.00        | 90.00       | 120.00       |
| B         | La <sub>2</sub> O <sub>3</sub> | 13.8371 | 3.9043  | 9.0648  | 90.00        | 102.49      | 90.00        |
|           | Nd <sub>2</sub> O <sub>3</sub> | 14.2789 | 3.6693  | 8.9390  | 90.00        | 99.72       | 90.00        |
|           | Sm <sub>2</sub> O <sub>3</sub> | 14.1025 | 3.5969  | 8.7972  | 90.00        | 99.84       | 90.00        |
|           | Gd <sub>2</sub> O <sub>3</sub> | 13.9329 | 3.5277  | 8.6584  | 90.00        | 99.93       | 90.00        |
|           | Dy <sub>2</sub> O <sub>3</sub> | 13.8088 | 3.4715  | 8.5484  | 90.00        | 100.03      | 90.00        |
|           | Er <sub>2</sub> O <sub>3</sub> | 13.6948 | 3.4222  | 8.4512  | 90.00        | 100.10      | 90.00        |
|           | Lu <sub>2</sub> O <sub>3</sub> | 13.5291 | 3.3511  | 8.3077  | 90.00        | 100.19      | 90.00        |
| C         | La <sub>2</sub> O <sub>3</sub> | 11.2756 | 11.2756 | 11.2756 | 90.00        | 90.00       | 90.00        |
|           | Nd <sub>2</sub> O <sub>3</sub> | 11.0516 | 11.0516 | 11.0516 | 90.00        | 90.00       | 90.00        |
|           | Sm <sub>2</sub> O <sub>3</sub> | 10.8647 | 10.8647 | 10.8647 | 90.00        | 90.00       | 90.00        |
|           | Gd <sub>2</sub> O <sub>3</sub> | 10.6845 | 10.6845 | 10.6845 | 90.00        | 90.00       | 90.00        |
|           | Dy <sub>2</sub> O <sub>3</sub> | 10.5426 | 10.5426 | 10.5426 | 90.00        | 90.00       | 90.00        |
|           | Er <sub>2</sub> O <sub>3</sub> | 10.4165 | 10.4165 | 10.4165 | 90.00        | 90.00       | 90.00        |
|           | Lu <sub>2</sub> O <sub>3</sub> | 10.2322 | 10.2322 | 10.2322 | 90.00        | 90.00       | 90.00        |
| H         | La <sub>2</sub> O <sub>3</sub> | 7.8107  | 7.8072  | 12.0711 | 90.00        | 90.01       | 119.99       |
|           | Nd <sub>2</sub> O <sub>3</sub> | 7.6481  | 7.6480  | 12.0234 | 90.00        | 90.00       | 120.00       |
|           | Sm <sub>2</sub> O <sub>3</sub> | 7.5150  | 7.5121  | 11.8660 | 90.00        | 90.01       | 120.00       |
|           | Gd <sub>2</sub> O <sub>3</sub> | 7.3845  | 7.3831  | 11.7156 | 89.99        | 90.02       | 119.98       |
|           | Dy <sub>2</sub> O <sub>3</sub> | 7.2822  | 7.2800  | 11.6072 | 89.99        | 90.02       | 119.98       |
|           | Er <sub>2</sub> O <sub>3</sub> | 7.1912  | 7.1931  | 11.5096 | 90.01        | 89.98       | 120.02       |
|           | Lu <sub>2</sub> O <sub>3</sub> | 7.0627  | 7.0556  | 11.3706 | 90.00        | 90.04       | 119.97       |
| X         | La <sub>2</sub> O <sub>3</sub> | 8.7135  | 8.7135  | 8.8381  | 90.00        | 90.00       | 89.64        |
|           | Nd <sub>2</sub> O <sub>3</sub> | 8.5456  | 8.5449  | 8.6884  | 90.00        | 90.00       | 89.30        |
|           | Sm <sub>2</sub> O <sub>3</sub> | 8.4090  | 8.4089  | 8.5372  | 90.00        | 90.00       | 89.16        |
|           | Gd <sub>2</sub> O <sub>3</sub> | 8.2771  | 8.2776  | 8.3915  | 90.00        | 90.00       | 89.04        |
|           | Dy <sub>2</sub> O <sub>3</sub> | 8.1732  | 8.1730  | 8.2772  | 90.00        | 90.00       | 88.94        |
|           | Er <sub>2</sub> O <sub>3</sub> | 8.0806  | 8.0807  | 8.1753  | 90.00        | 90.00       | 88.87        |
|           | Lu <sub>2</sub> O <sub>3</sub> | 7.9434  | 7.9434  | 8.0294  | 90.00        | 90.00       | 88.75        |

## Shifting Energies

**Table S2.** Parameters used to shift the total energies of the disordered phases (H and X), and the  $\text{La}_2\text{O}_3$  A phase. The shifting parameters are in meV/atom.

| Compound                | A     | H     | X     |
|-------------------------|-------|-------|-------|
| $\text{La}_2\text{O}_3$ | 13.00 | 48.00 | 14.35 |
| $\text{Nd}_2\text{O}_3$ |       | 53.75 | 31.15 |
| $\text{Sm}_2\text{O}_3$ |       | 43.55 | 32.13 |
| $\text{Gd}_2\text{O}_3$ |       | 45.50 | 34.23 |
| $\text{Dy}_2\text{O}_3$ |       | 46.30 | 49.00 |
| $\text{Er}_2\text{O}_3$ |       | 48.00 | 57.88 |
| $\text{Lu}_2\text{O}_3$ |       | 50.00 | 63.75 |

## Metastable Phase Diagrams

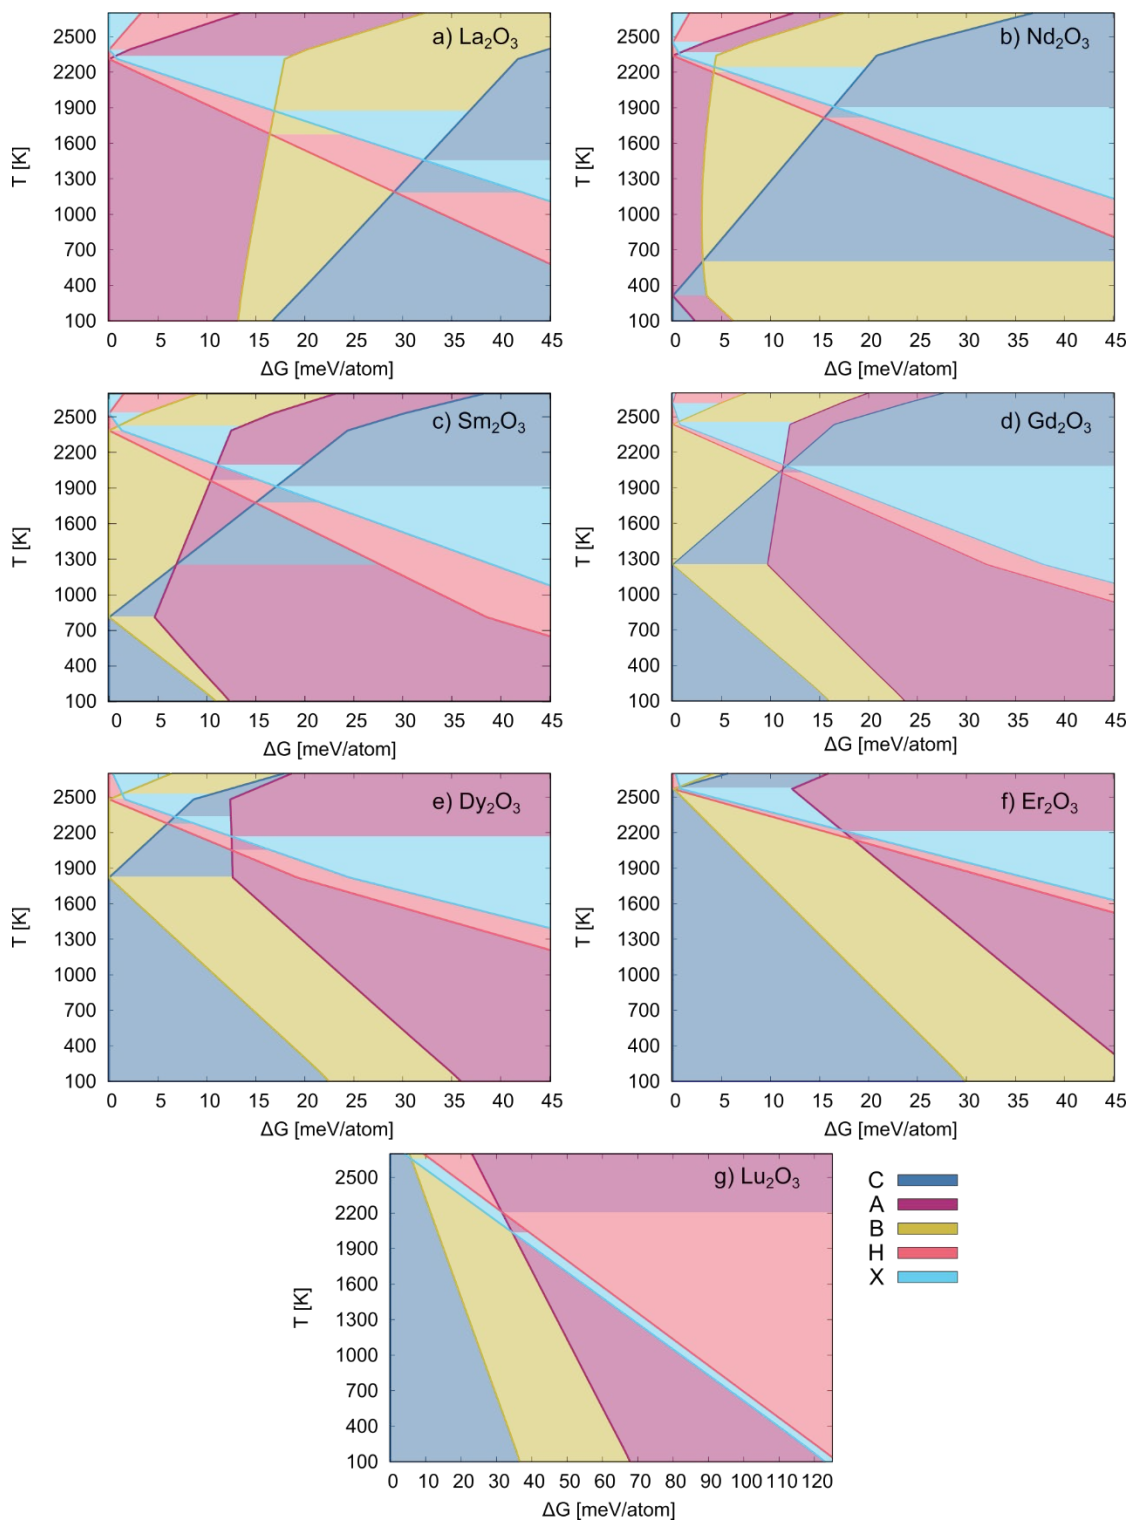

**Figure S2.** Metastable phase diagrams of: a)  $\text{La}_2\text{O}_3$ , b)  $\text{Nd}_2\text{O}_3$ , c)  $\text{Sm}_2\text{O}_3$ , d)  $\text{Gd}_2\text{O}_3$ , e)  $\text{Dy}_2\text{O}_3$ , f)  $\text{Er}_2\text{O}_3$ , and g)  $\text{Lu}_2\text{O}_3$ . The C, A, H, B and X phases are shown in blue, magenta, red, yellow and light-blue,

respectively. Note that the metastability threshold scale of Lu<sub>2</sub>O<sub>3</sub> is up to 125 meV/atom so the X and H phase metastable regions are visible.
